# Supplementary material
Source: HighWire-hosted journal article supplement (https://bmjopen.bmj.com/content/15/4/e096404)
Supplement: inline-supplementary-material-1 [file inline-supplementary-material-1.pdf]

|                                                                                         |                                         |                                                                                                                                                                                          |                            |                                            |
|-----------------------------------------------------------------------------------------|-----------------------------------------|------------------------------------------------------------------------------------------------------------------------------------------------------------------------------------------|----------------------------|--------------------------------------------|
| INSTRUCTIONS:                                                                           |                                         |                                                                                                                                                                                          |                            |                                            |
| 1. Separate form should be filled for each subject.                                     |                                         |                                                                                                                                                                                          |                            |                                            |
| 2. Introduce yourself and explain purpose of your interview                             |                                         |                                                                                                                                                                                          |                            |                                            |
| 3. informed consent should be obtained from participants parent before the interview    |                                         |                                                                                                                                                                                          |                            |                                            |
| 4. Written assent should be obtained from the participant once agree for participation. |                                         |                                                                                                                                                                                          |                            |                                            |
| Day/ Month/ Year                                                                        |                                         |                                                                                                                                                                                          |                            |                                            |
| Form filled by: _____                                                                   |                                         |                                                                                                                                                                                          | Date: __/__/__             |                                            |
| Form checked and edited by: _____                                                       |                                         |                                                                                                                                                                                          | Date: __/__/__             |                                            |
| Form entered by: _____                                                                  |                                         |                                                                                                                                                                                          | Date: __/__/__             |                                            |
| Study ID: _____                                                                         |                                         |                                                                                                                                                                                          |                            |                                            |
| SECTION 1: SOCIO-DEMOGRAPHIC INFORMATION                                                |                                         |                                                                                                                                                                                          |                            |                                            |
| Q                                                                                       | Variable                                | Code                                                                                                                                                                                     | Skip                       | Response                                   |
| 1.0                                                                                     | Name (optional)                         |                                                                                                                                                                                          |                            | _____                                      |
| 1.1                                                                                     | Gender                                  | 1. Female<br>2. Male                                                                                                                                                                     |                            | _____                                      |
| 1.2                                                                                     | How old are you? (in years)             | Write completed age in years                                                                                                                                                             |                            | <div><div></div><div></div></div><br>Years |
| 1.3                                                                                     | How old were you at your last birthday? | Write response in years<br>(CROSS-CHECK WITH DATE OF BIRTH)                                                                                                                              |                            | _____                                      |
| 1.4                                                                                     | What is your Marital status?            | 1. Single<br>2. Married<br>3.Divorced<br>4.Widowed<br>5. Separated                                                                                                                       |                            | _____                                      |
| 1.5                                                                                     | Can you read, for example, a newspaper? | 1. Yes<br>2. No                                                                                                                                                                          |                            | _____                                      |
| 1.6                                                                                     | Have you ever-attended school?          | 1. Yes<br>2. No                                                                                                                                                                          |                            | _____                                      |
| 1.7                                                                                     | Education status of participant         | 1. No education<br>2. Primary education (completing grade 1 – 5)<br>3. Middle education (completing grade 6 – 8)<br>4. Secondary education (grade 9 – 10)/O level<br>5. Higher secondary | If NO education, Skip Q1.8 | _____                                      |

|             |                                                                                               |                                                                                                                                                                                                                                                                              |                                           |       |
|-------------|-----------------------------------------------------------------------------------------------|------------------------------------------------------------------------------------------------------------------------------------------------------------------------------------------------------------------------------------------------------------------------------|-------------------------------------------|-------|
|             |                                                                                               | education (grade 11 - 12)/A level<br>6. Above higher secondary (grade 13 and above)                                                                                                                                                                                          |                                           |       |
| <b>1.8</b>  | Is the school, college or university that you Attend(ed) a government or private institution? | 1. Government<br>2. Private                                                                                                                                                                                                                                                  |                                           | _____ |
| <b>1.9</b>  | Which language do you speak?                                                                  | 1. Sindhi<br>2. Urdu<br>3. Pashto<br>4. Punjabi<br>99. Other (specify): _____                                                                                                                                                                                                |                                           | _____ |
| <b>1.10</b> | What is your family system?                                                                   | 1. Nuclear family<br>2. Extended family                                                                                                                                                                                                                                      |                                           | _____ |
| <b>1.11</b> | Is your father alive?                                                                         | 1. Yes<br>2. No                                                                                                                                                                                                                                                              | If <b>NO</b> , skip Q.1.12, 2.24 and 2.25 | _____ |
| <b>1.12</b> | Does he live in the same household as you?                                                    | 1. Yes<br>2. No                                                                                                                                                                                                                                                              | If <b>NO</b> , skip Q.2.24 and 2.25       | _____ |
| <b>1.13</b> | What's your father's level of education?                                                      | 1. No education<br>2. Primary education (completing grade 1 – 5)<br>3. Middle education (completing grade 6 – 8)<br>4. Secondary education (grade 9 – 10)/O level<br>5. Higher secondary education (grade 11 - 12)/A level<br>6. Above higher secondary (grade 13 and above) |                                           | _____ |
| <b>1.14</b> | What is/was your father's occupation?                                                         | Write name of his occupation                                                                                                                                                                                                                                                 |                                           | _____ |
| <b>1.15</b> | Is your mother alive?                                                                         | 1. Yes<br>2. No                                                                                                                                                                                                                                                              | If <b>NO</b> , skip Q1.16, 2.26 and 2.27  | _____ |
| <b>1.16</b> | Does she live in the same household as you?                                                   | 1. Yes<br>2. No                                                                                                                                                                                                                                                              | If <b>NO</b> , skip Q.2.26 and 2.27       | _____ |

|             |                                                                           |                                                                                                                                                                                                                                                                              |                           |       |
|-------------|---------------------------------------------------------------------------|------------------------------------------------------------------------------------------------------------------------------------------------------------------------------------------------------------------------------------------------------------------------------|---------------------------|-------|
| <b>1.17</b> | What's your mother's level of education?                                  | 1. No education<br>2. Primary education (completing grade 1 – 5)<br>3. Middle education (completing grade 6 – 8)<br>4. Secondary education (grade 9 – 10)/O level<br>5. Higher secondary education (grade 11 - 12)/A level<br>6. Above higher secondary (grade 13 and above) |                           | <hr/> |
| <b>1.18</b> | What's your mother's occupation?                                          | Write name of her occupation                                                                                                                                                                                                                                                 |                           | <hr/> |
| <b>1.19</b> | Are you currently working to earn?                                        | 1. Yes<br>2. No                                                                                                                                                                                                                                                              | If <b>NO</b> , skip Q1.20 | <hr/> |
| <b>1.20</b> | What type of work do (did) you do?                                        | Write actual response                                                                                                                                                                                                                                                        |                           | <hr/> |
| <b>1.21</b> | What is your family monthly income?                                       | 1. 5000-20,000<br>2. 21,000-40,000<br>3. 41,000-60,000<br>4. 61,000-80,000<br>5. 81,000-100,000<br>6. Above 100,000                                                                                                                                                          |                           | <hr/> |
| <b>1.22</b> | Does your household have any of the following:<br>[RECORD ALL THAT APPLY] | Specify amount.                                                                                                                                                                                                                                                              |                           |       |
|             | 1. Electricity                                                            | 1. Yes<br>2. No                                                                                                                                                                                                                                                              |                           | <hr/> |
|             | 2. Electric fan                                                           | How many?                                                                                                                                                                                                                                                                    |                           | <hr/> |
|             | 3. Color television                                                       | How many?                                                                                                                                                                                                                                                                    |                           | <hr/> |
|             | 4. Refrigerator                                                           | How many?                                                                                                                                                                                                                                                                    |                           | <hr/> |
|             | 5. Radio/transistor                                                       | How many?                                                                                                                                                                                                                                                                    |                           | <hr/> |

|  |                             |           |  |       |
|--|-----------------------------|-----------|--|-------|
|  | 6. Mobile phone             | How many? |  | _____ |
|  | 7. Computer/laptop          | How many? |  | _____ |
|  | 8. Washing machine          | How many? |  | _____ |
|  | 9. Sewing machine           | How many? |  | _____ |
|  | 10. Air cooler              | How many? |  | _____ |
|  | 11. Air conditioner         | How many? |  | _____ |
|  | 12. Animal-drawn cart       | How many? |  | _____ |
|  | 13. Bicycle                 | How many? |  | _____ |
|  | 14. Tractor/boat with motor | How many? |  | _____ |
|  | 15. Car/truck               | How many? |  | _____ |
|  | 16. Motorcycle/scooter      | How many? |  | _____ |
|  | 17. Rickshaw/van            | How many? |  | _____ |
|  | 18. Chair                   | How many? |  | _____ |
|  | 19. Cot/bed                 | How many? |  | _____ |
|  | 20. Mattress                | How many? |  | _____ |
|  | 21. Sofa                    | How many? |  | _____ |
|  | 22. Table                   | How many? |  | _____ |
|  | 23. Almirah/cabinet         | How many? |  | _____ |
|  | 24. Livestock               | How many? |  | _____ |
|  | 25. Poultry                 | How many? |  | _____ |

## SECTION 2: KNOWLEDGE, ATTITUDE, AND PRACTICES

| S/no                                                                                                                                                    | Questions                                                                                                                                         | Code                                                                                                                                 | Skip                      | Response |
|---------------------------------------------------------------------------------------------------------------------------------------------------------|---------------------------------------------------------------------------------------------------------------------------------------------------|--------------------------------------------------------------------------------------------------------------------------------------|---------------------------|----------|
| 2.1                                                                                                                                                     | Have you heard of HIV or AIDS ( <i>use local terms</i> )?                                                                                         | 1. Yes<br>2. No                                                                                                                      |                           |          |
| I am now going to read you some statements about HIV/AIDS. Please tell me whether you think the statement is true, or false, or whether you don't know. |                                                                                                                                                   |                                                                                                                                      |                           |          |
| 2.2                                                                                                                                                     | It is possible to cure AIDS                                                                                                                       | 1. True<br>2. False<br>96. Don't know                                                                                                |                           |          |
| 2.3                                                                                                                                                     | A person with HIV always looks emaciated or unhealthy in some way                                                                                 | 1. True<br>2. False<br>96. Don't know                                                                                                |                           |          |
| 2.4                                                                                                                                                     | People can take a simple test to find out whether they have HIV                                                                                   | 1. True<br>2. False<br>96. Don't know                                                                                                |                           |          |
| 2.5                                                                                                                                                     | Apart from HIV/AIDS, there are other diseases that men and women can catch by having sexual intercourse. Have you heard of any of these diseases? | 1. Yes<br>2. No                                                                                                                      |                           |          |
| 2.6                                                                                                                                                     | What are the signs and symptoms of a sexually transmitted disease in men?<br>(CIRCLE EACH MENTIONED)                                              | 1. Discharge from penis<br>2. Pain during urination<br>3. Ulcer/sores in genital area<br>99. Other _____<br>96. Don't know any signs |                           |          |
| 2.7                                                                                                                                                     | And what are the signs or symptoms when a women is infected?                                                                                      | 1. Vaginal discharge<br>2. Pain during urination<br>3. Ulcer/sores in genital area<br>99. Other _____<br>96. Don't know any signs    |                           |          |
| 2.8                                                                                                                                                     | <u>Pill</u><br>Women can take a pill every day                                                                                                    | 1. Yes (spont.)<br>2. Yes (prompted)<br>3. No                                                                                        | If <b>NO</b> , skip Q2.8b |          |
| 2.8b                                                                                                                                                    | Do you know any place or person where young people could obtain this method?                                                                      | 1. Yes<br>2. No                                                                                                                      |                           |          |
| 2.9                                                                                                                                                     | <u>Injection</u><br>Women can have an injection every 2 or every 3 months.                                                                        | 1. Yes (spont.)<br>2. Yes (prompted)<br>3. No                                                                                        | If <b>NO</b> , skip Q2.9b |          |

|                                                                                                                                                                            |                                                                                                             |                                                    |                            |  |
|----------------------------------------------------------------------------------------------------------------------------------------------------------------------------|-------------------------------------------------------------------------------------------------------------|----------------------------------------------------|----------------------------|--|
| <b>2.9b</b>                                                                                                                                                                | Do you know any place or person where young people could obtain this method?"                               | 1. Yes<br>2. No                                    |                            |  |
| <b>2.10</b>                                                                                                                                                                | <u>Condom</u><br>A man can put a rubber device on his penis before intercourse.                             | 1. Yes (spont.)<br>2. Yes (prompted)<br>3. No      | If <b>NO</b> , skip Q2.10b |  |
| <b>2.10b</b>                                                                                                                                                               | Do you know any place or person where young people could obtain this method?                                | 1. Yes<br>2. No                                    |                            |  |
| <b>2.11</b>                                                                                                                                                                | <u>Emergency Contraceptive Pills</u><br>A woman can take pills soon after intercourse.                      | 1. Yes (spont.)<br>2. Yes (prompted)<br>3. No      | If <b>NO</b> , skip Q2.11b |  |
| <b>2.11b</b>                                                                                                                                                               | Do you know any place or person where young people could obtain this method?                                | 1. Yes<br>2. No                                    |                            |  |
| <b>2.12</b>                                                                                                                                                                | <u>Withdrawal</u><br>A man can pull out of a woman before climax.                                           | 1. Yes (spont.)<br>2. Yes (prompted)<br>3. No      |                            |  |
| <b>2.13</b>                                                                                                                                                                | <u>Periodic Abstinence/Rhythm</u><br>A couple can avoid sex on days when pregnancy is most likely to occur. | 1. Yes (spont.)<br>2. Yes (prompted)<br>3. No      |                            |  |
| <b>2.14</b>                                                                                                                                                                | Have you ever seen a condom?                                                                                | 1. Yes<br>2. No                                    |                            |  |
| People have different opinions about condoms. I will read out some opinions. For each one, I want you to tell me whether you agree or disagree, or whether you don't know. |                                                                                                             |                                                    |                            |  |
| <b>2.15</b>                                                                                                                                                                | Condoms are an effective method of preventing pregnancy.                                                    | 1. Agree<br>96. Don't know/not sure<br>2. Disagree |                            |  |
| <b>2.16</b>                                                                                                                                                                | Condoms can be used more than once.                                                                         | 1. Agree<br>96. Don't know/not sure<br>2. Disagree |                            |  |
| <b>2.17</b>                                                                                                                                                                | Condoms are an effective way of protecting against HIV/AIDS                                                 | 1. Agree<br>96. Don't know/not sure<br>2. Disagree |                            |  |

|                                                                                                                                                                                        |                                                                                                                                                                                      |                                                                                                 |  |  |
|----------------------------------------------------------------------------------------------------------------------------------------------------------------------------------------|--------------------------------------------------------------------------------------------------------------------------------------------------------------------------------------|-------------------------------------------------------------------------------------------------|--|--|
| 2.18                                                                                                                                                                                   | Condoms reduce sexual pleasure                                                                                                                                                       | 1. Agree<br>96. Don't know/not sure<br>2. Disagree                                              |  |  |
| 2.19                                                                                                                                                                                   | Condoms are an effective way of protecting against sexually transmitted diseases                                                                                                     | 1. Agree<br>96. Don't know/not sure<br>2. Disagree                                              |  |  |
| Now I have some other questions on adolescent pregnancy. I will read you some statements. Please tell me whether you think the statement is true, or false, or whether you don't know. |                                                                                                                                                                                      |                                                                                                 |  |  |
| 2.20                                                                                                                                                                                   | A woman can get pregnant on the very first time that she has sexual intercourse.                                                                                                     | 1. True<br>2. False<br>96. Don't know/not sure                                                  |  |  |
| 2.21                                                                                                                                                                                   | A woman stops growing after she has had sexual intercourse for the first time.                                                                                                       | 1. True<br>2. False<br>96. Don't know/not sure                                                  |  |  |
| 2.22                                                                                                                                                                                   | Masturbation causes serious damage to health.                                                                                                                                        | 1. True<br>2. False<br>96. Don't know/not sure                                                  |  |  |
| 2.23                                                                                                                                                                                   | A woman is most likely to get pregnant if she has sexual intercourse half way between her periods.                                                                                   | 1. True<br>2. False<br>96. Don't know/not sure                                                  |  |  |
| <b>Attitude</b>                                                                                                                                                                        |                                                                                                                                                                                      |                                                                                                 |  |  |
| 2.24                                                                                                                                                                                   | (Ask this question if his/her father is alive and living in same household)<br><br>Do you find it difficult or easy to talk with your father about things that are important to you? | 1. Very easy<br>2. Easy<br>3. Average<br>4. Difficult<br>5. Very difficult<br>6. Do not see him |  |  |
| 2.25                                                                                                                                                                                   | Have you ever discussed sex-related matters with your father?<br>If YES often or occasionally?                                                                                       | 1. Often<br>2. Occasionally<br>3. Never                                                         |  |  |
| 2.26                                                                                                                                                                                   | (Ask this question if his/her mother is alive                                                                                                                                        | 1. Very easy<br>2. Easy                                                                         |  |  |

|                  |                                                                                                                                                   |                                                                                                                                            |  |  |
|------------------|---------------------------------------------------------------------------------------------------------------------------------------------------|--------------------------------------------------------------------------------------------------------------------------------------------|--|--|
|                  | <b>and living in same household)</b><br><br>Do you find it difficult or easy to talk with your mother about things that are important to you?     | 3. Average<br>4. Difficult<br>5. Very difficult<br>6. Do not see him                                                                       |  |  |
| <b>2.27</b>      | Have you ever discussed sex-related matters with your mother?<br>If <b>YES</b> often or occasionally?                                             | 1. Often<br>2. Occasionally<br>3. Never                                                                                                    |  |  |
| <b>2.28</b>      | If a friend of yours needed treatment for a sexually transmitted disease, where could he or she obtain such treatment?<br>(CIRCLE EACH MENTIONED) | 1. Shop<br>2. Pharmacy<br>3. Govt. hospitals/health centre/clinic<br>4. Private doctor/nurse/clinic<br>99. Other (please specify)<br>_____ |  |  |
| <b>2.29</b>      | It would be too embarrassing for someone like me to buy or obtain condoms.                                                                        | 1. Agree<br>96. Don't know/not sure<br>2. Disagree                                                                                         |  |  |
| <b>2.30</b>      | If unmarried couples want to have sexual intercourse before marriage, they should use condoms.                                                    | 1. Agree<br>96. Don't know/not sure<br>2. Disagree                                                                                         |  |  |
| <b>Practices</b> |                                                                                                                                                   |                                                                                                                                            |  |  |
| <b>2.31</b>      | Ever utilized any SRH services?                                                                                                                   | 1. Yes<br>2. No                                                                                                                            |  |  |
| <b>2.32</b>      | Ever tested for HIV                                                                                                                               | 1. Yes<br>2. No                                                                                                                            |  |  |
| <b>2.33</b>      | Intention of having an HIV Test                                                                                                                   | 1. Yes<br>2. No                                                                                                                            |  |  |
| <b>2.34</b>      | Practice of parent-adolescent communication                                                                                                       | 1. Yes<br>2. No                                                                                                                            |  |  |



|      |                                                                  |                                                                                                               |  |  |
|------|------------------------------------------------------------------|---------------------------------------------------------------------------------------------------------------|--|--|
| 2.35 | Preferred group for SRH issue discussion? (CIRCLE YOUR RESPONSE) | 1. Friends<br>2. Parents<br>3. Siblings<br>4. Partner<br>5. Health Professionals<br>6. Other (please specify) |  |  |
|------|------------------------------------------------------------------|---------------------------------------------------------------------------------------------------------------|--|--|
